# Supplementary material for: Detecting microsatellites within genomes: significant variation among algorithms
Source: PubMed Central journal article supplement (PMC1876248; doi:10.1186/1471-2105-8-125), 2007-04-18

**Additional File 4** Length distributions of perfect detections (log scale) in the whole genome of *Neurospora crassa* for the six motif classes using TRF with alignment weight {2,7,7} and minimum alignment score 20, Mreps with resolution 1, Sputnik with validation score 7 and mismatch penalty -6, STAR, and RepeatMasker.

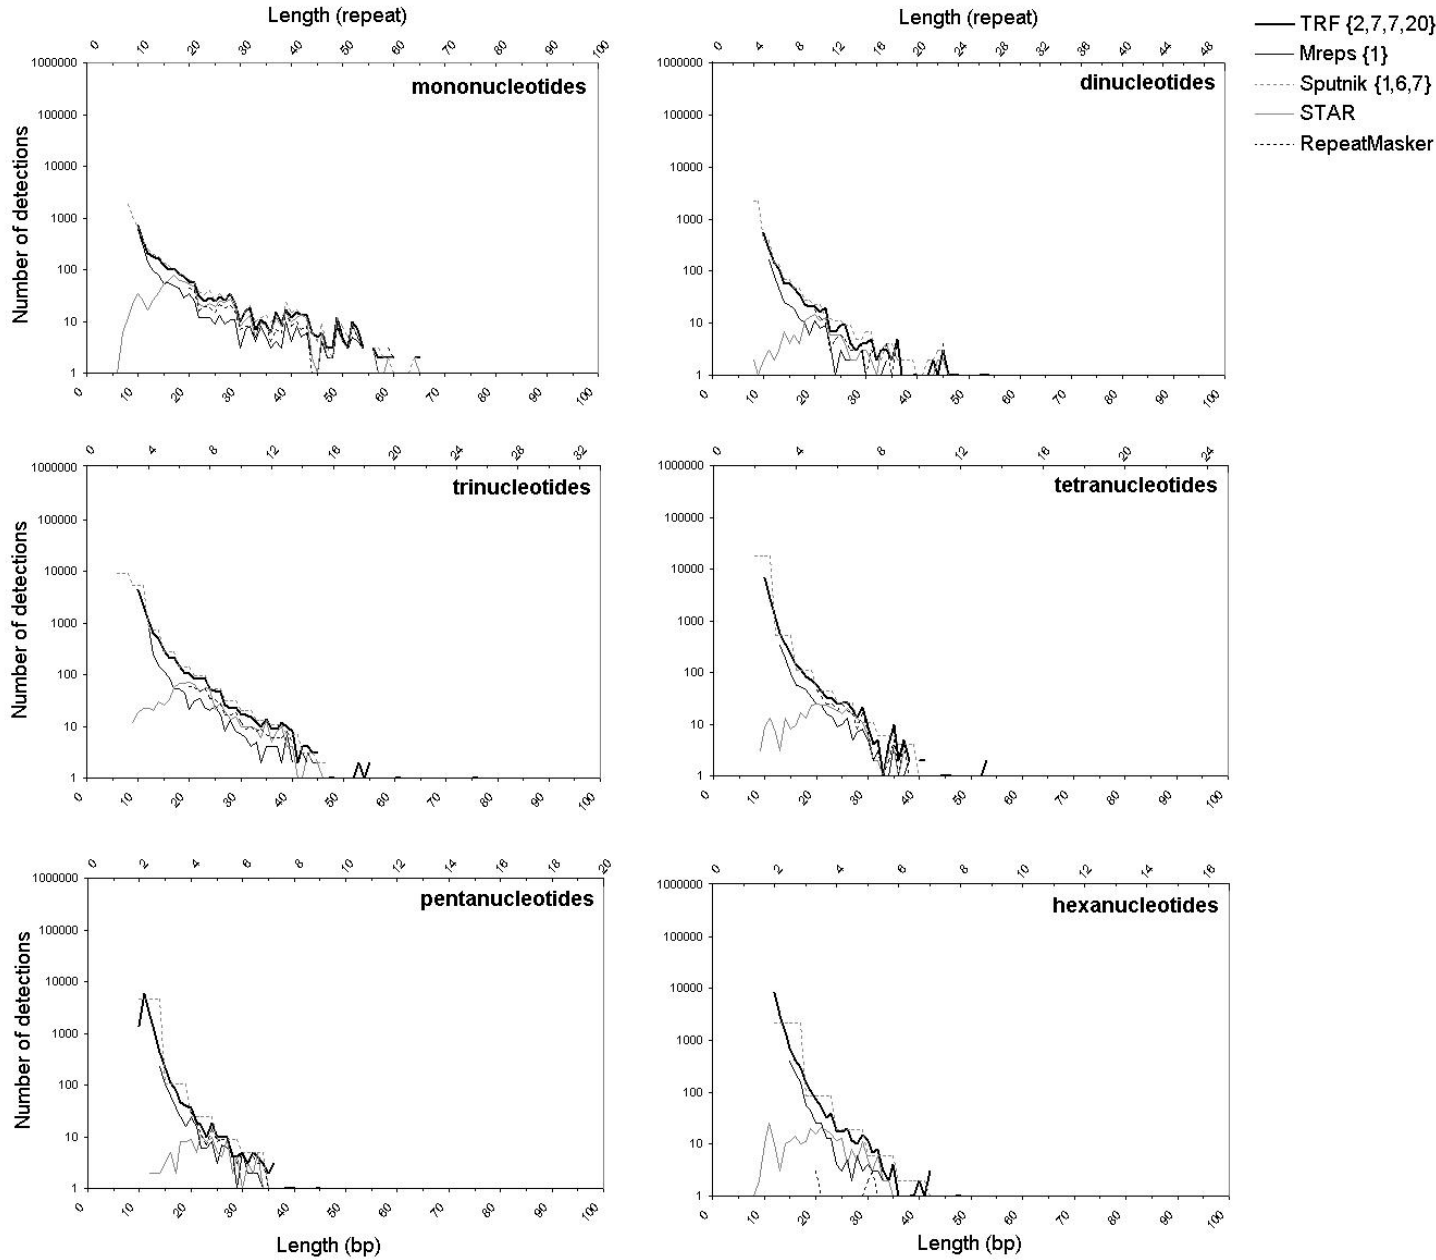

Supplement: 1471-2105-8-125-S4.pdf [file 1471-2105-8-125-S4.pdf]
